# Supplementary material for: A new visual test for p-quinone and its relevance to the biodiesel industry
Source: Royal Society of Chemistry journal article supplement (doi:10.1039/c2ay25591j), 2012-01-01
Supplement: c2ay25591j.pdf [file c2ay25591j.pdf]

## Supporting Informations For

### A new visual test for *p*-quinone and its relevance to biodiesel industry

Samrat Ghosh, Shilpa Setia, Sumyra Sidiq and Santanu Kumar Pal\*<sup>a</sup>

Department of Chemical Sciences  
Indian Institute of Science Education and Research (IISER), Mohali  
Knowledge city, Sector-81, SAS Nagar, Mohali 140306, India  
E-mail: [skpal@iisermohali.ac.in](mailto:skpal@iisermohali.ac.in)

#### SUPPLEMENTARY DATA

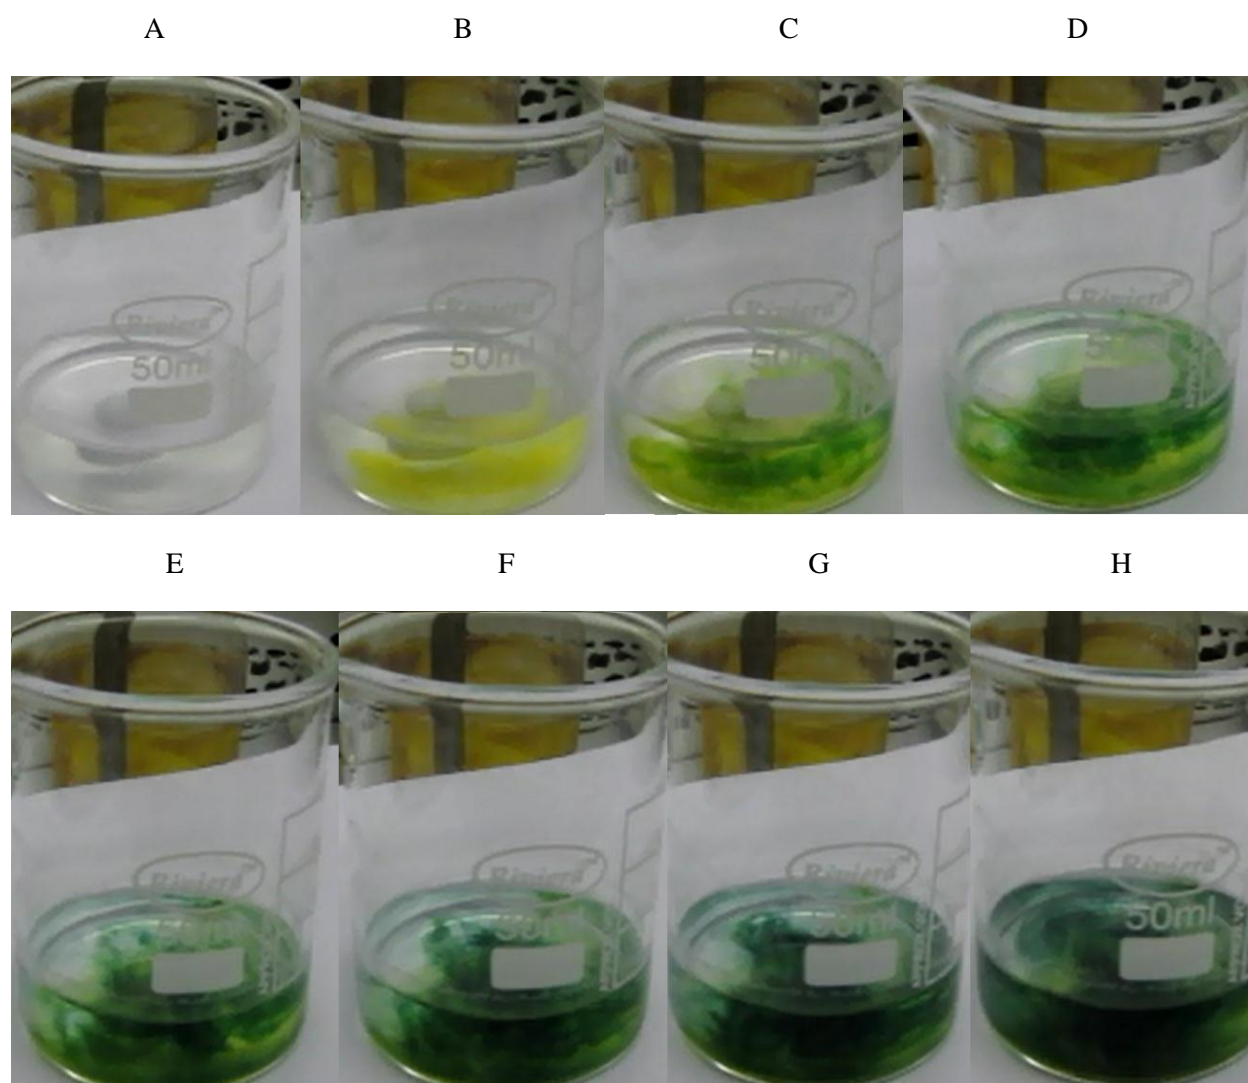

**Figure S1.** Progression of colour change in a mixture containing acetone and methoxide (A) followed by addition of negligible amount of *p*-quinone (B-H).

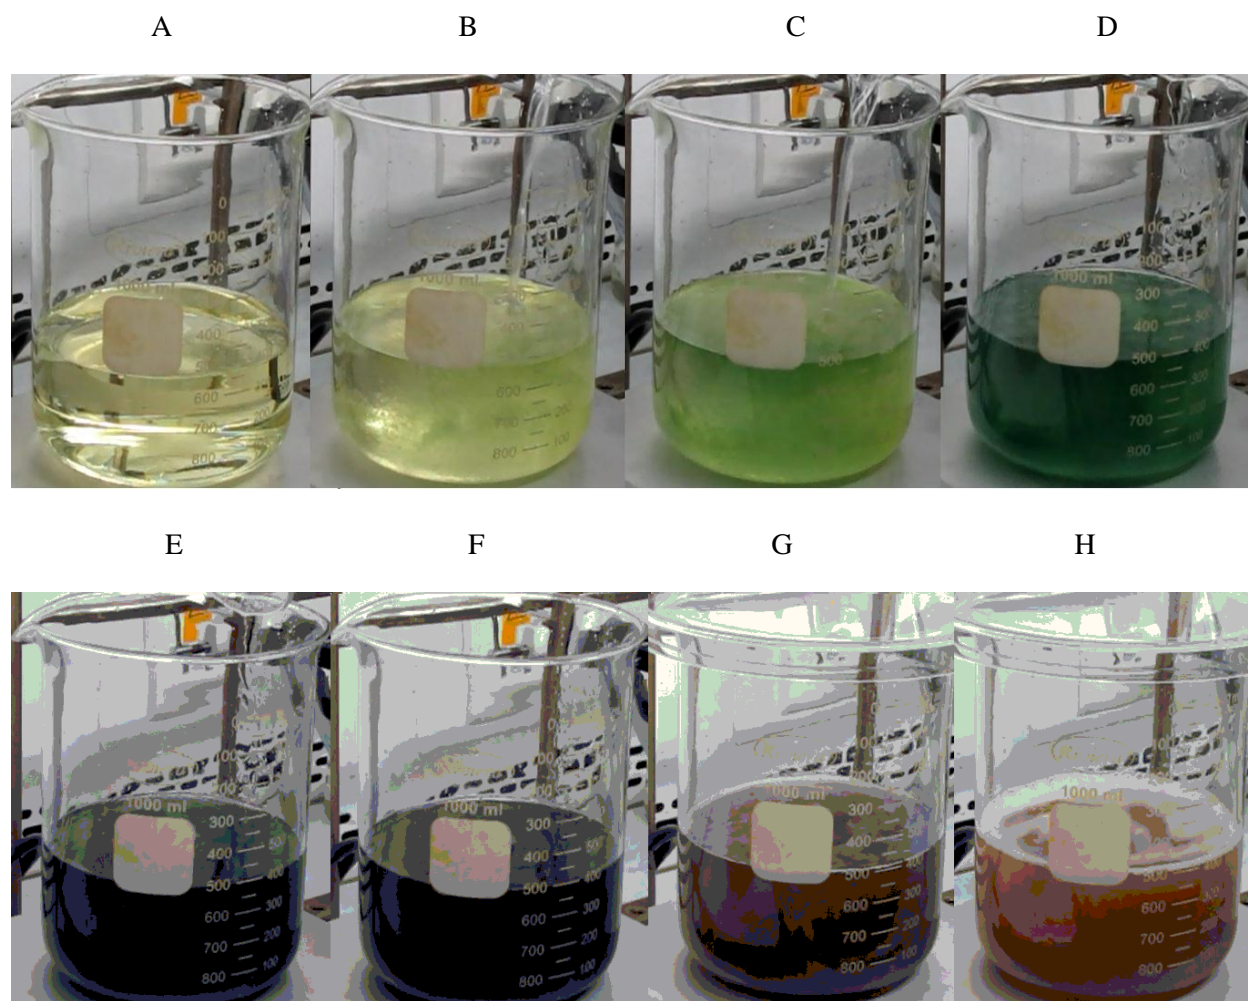

**Figure S2.** Progression of colour change (A to H) during the synthesis of biodiesel from commercially available soybean oil (Fortune brand) using acetone and methoxide as a co-solvent and catalyst, respectively.

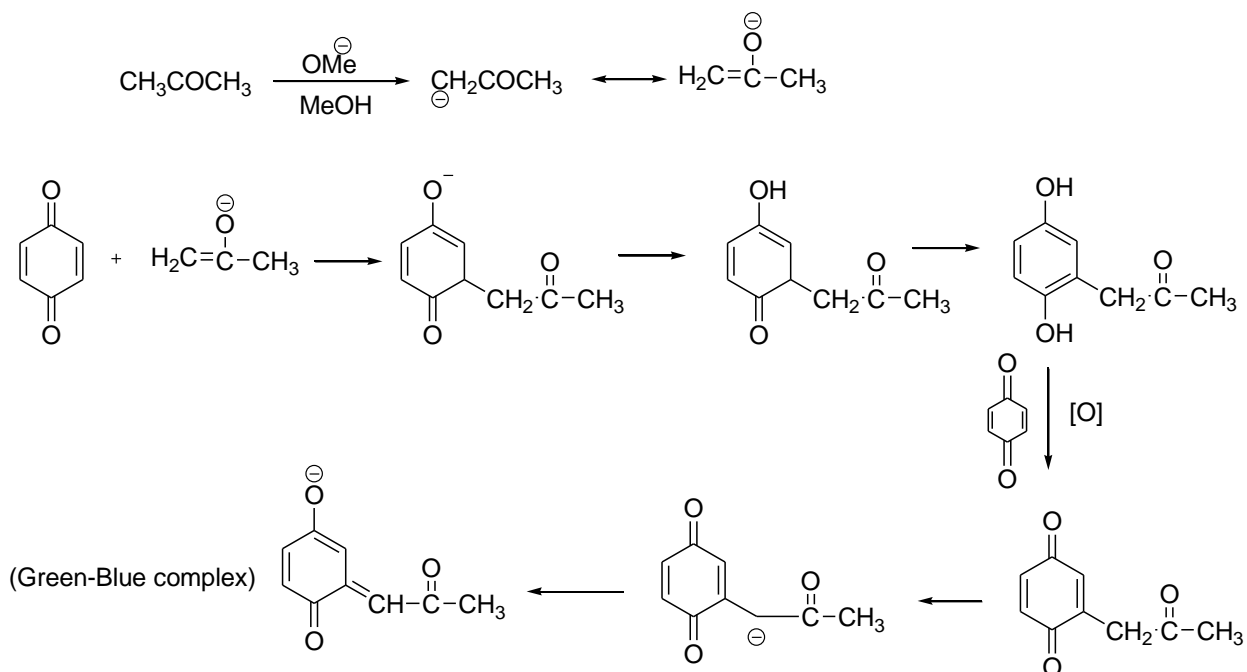

**Figure S3.** Mechanism of formation of green-blue complex with acetone and methoxide in presence of *p*-quinone.

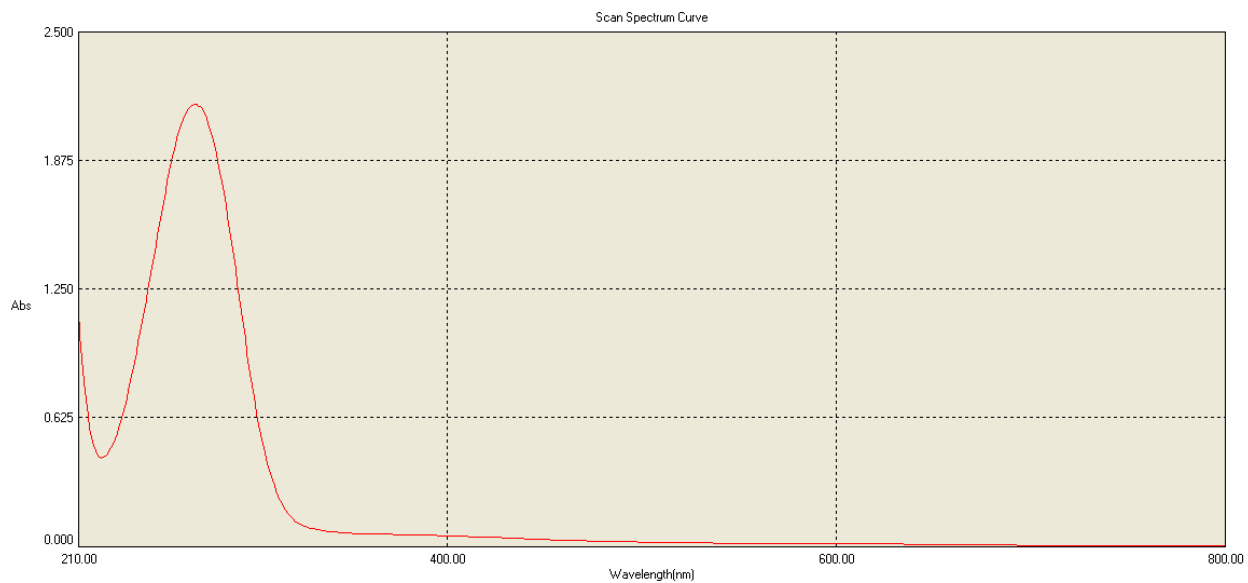

**Figure S4.** UV-Vis spectra of the green-blue complex on addition of *p*-quinone into the mixture of acetone and methoxide solution.
